# Supplementary material for: Sperm quality of artificially matured shortfinned eel is not affected by human chorionic gonadotropin dose and route of administration
Source: PeerJ. 2022 Aug 23;10:e13742. doi: 10.7717/peerj.13742 (PMC9415425; doi:10.7717/peerj.13742)
Supplement: Supplemental Information 1 [file peerj-10-13742-s001.xlsx]

## Sheet: Treatment Codes
	Tag #	Fish #	Dose	Code	BW t=0		CODE for CASA Treatments
IP	66F C7B	1	0	10	142
	DF6 97F	2	0	10	134
	DF9 913	3	0	10	158		Injection Route	Code
	E18 F45	4	0	10	136		IP	1
	E18 13F	5	0	10	142		IM	2
IM	E18 A67	6	0	20	140
	66E D8C	7	0	20	172		Dose	Code
	DF7 3CB	8	0	20	136		0	0
	DFA F79	9	0	20	154		250	25
	DFA ACD	10	0	20	168		500	50
IP	DF6 1C4	11	250	125	144		1000	100
	DFA 4DC	12	250	125	136
	E17 665	13	250	125	184		DOSE	IP	IM
	DFA 2A6	14	250	125	134		0	10	20
	DFA 565	15	250	125	122		250	125	225
IM	E18 E72	16	250	225	160		500	150	250
	DF9 B34	17	250	225	126		1000	1100	2100
	DF4 E8F	18	250	225	128
	643 3FA	19	250	225	134
	EI7 25E	20	250	225	122
IP	E16 E40	21	500	150	132
	DFA E75	22	500	150	150
	E17 C80	23	500	150	140
	DF5 7B8	24	500	150	126
	E16 C45	25	500	150	120
IM	DF6 BAC	26	500	250	126
	E19 615	27	500	250	148
	DF4 E0A	28	500	250	128
	DF4 7FA	29	500	250	162
	E18 1FF	30	500	250	120
IP	DFA 78F	31	1000	1100	132
	642 314	32	1000	1100	166
	E13 825	33	1000	1100	126
	DFA 391	34	1000	1100	134
	DFA D6B	35	1000	1100	120
IM	DF9 6FE	36	1000	2100	142
	DF5 FD0	37	1000	2100	122
	DF5 549	38	1000	2100	130
	E19 70A	39	1000	2100	126
	DF5 BDF	40	1000	2100	120

## Sheet: Sperm quality measures
FISH #	CODE	WEEK	ROUTE	DOSE	VAP	VSL	VCL	STR	LIN	MOTILE_%	PROGRESSIVE_%	Sperm Conc. (billion/ml)	Milt vol %BW
1	10	5	PP	C
2	10	5	PP	C
3	10	5	PP	C
4	10	5	PP	C
5	10	5	PP	C
6	20	5	MM	C
7	20	5	MM	C
8	20	5	MM	C
9	20	5	MM	C
10	20	5	MM	C
11	125	5	PP	Lo
12	125	5	PP	Lo	47.35	38.95	74.75	81.5	54	9	3	11.3028	0.113889
13	125	5	PP	Lo	101.35	92.65	123.85	88	72.5	60.5	48.5	10.1678	0.588421
14	125	5	PP	Lo
15	125	5	PP	Lo	78.55	72.65	100.95	90	69.5	37	24.5	9.8368	0.191803
16	225	5	MM	Lo	64.55	58.6	91.45	89	63	14	9	8.37075	0.239286
17	225	5	MM	Lo	34.3	28.4	64.2	83	48.5	6	0.5	8.5599	0.0835937
18	225	5	MM	Lo	80.7	72.1	109.25	86.5	65.5	25.5	17.5	6.66825	0.741667
19	225	5	MM	Lo
20	225	5	MM	Lo	81.75	74.25	108.6	89	66.5	24.5	19	5.72235	0.263846
21	150	5	PP	Med
22	150	5	PP	Med
23	150	5	PP	Med	69.8	63.45	89.35	88.5	68.5	27.5	14.5	8.72545	0.236111
24	150	5	PP	Med
25	150	5	PP	Med
26	250	5	MM	Med	50.45	42.4	75.45	82	56	10.5	3	10.1914	0.0886364
27	250	5	MM	Med
28	250	5	MM	Med	81.1	75	108	89	66.5	27.5	18	5.6041	0.931343
29	250	5	MM	Med	61.25	55.35	81.9	88	66.5	20	10.5	7.9451	0.270588
30	250	5	MM	Med	39.75	32.65	68.3	82	49.5	11	2	10.2152	0.0703125
31	1100	5	PP	Hi	59.75	52.7	83.25	84.5	61	10.5	5.5	7.66135	0.00434783
32	1100	5	PP	Hi
33	1100	5	PP	Hi
34	1100	5	PP	Hi	58.3	51.7	83.15	86.5	62.5	16	7.5	12.1068	0.149286
35	1100	5	PP	Hi	37.9	30.9	68.7	80	48.5	10	2	9.38755	0.184375
36	2100	5	MM	Hi
37	2100	5	MM	Hi
38	2100	5	MM	Hi
39	2100	5	MM	Hi	99	89.75	124.9	89.5	70.5	55.5	49	6.9047	0.737705
40	2100	5	MM	Hi
1	10	6	PP	C
2	10	6	PP	C
3	10	6	PP	C
4	10	6	PP	C
5	10	6	PP	C
6	20	6	MM	C
7	20	6	MM	C
8	20	6	MM	C
9	20	6	MM	C
10	20	6	MM	C
11	125	6	PP	Lo									0.14726
12	125	6	PP	Lo									0.292857
13	125	6	PP	Lo									0.826316
14	125	6	PP	Lo
15	125	6	PP	Lo									0.178226
16	225	6	MM	Lo									0.40119
17	225	6	MM	Lo
18	225	6	MM	Lo									0.219118
19	225	6	MM	Lo									0.018254
20	225	6	MM	Lo									0.55
21	150	6	PP	Med									0.316667
22	150	6	PP	Med
23	150	6	PP	Med
24	150	6	PP	Med									0.00923077
25	150	6	PP	Med									0.154839
26	250	6	MM	Med									0.161719
27	250	6	MM	Med
28	250	6	MM	Med									0.716667
29	250	6	MM	Med									0.363529
30	250	6	MM	Med									0.284677
31	1100	6	PP	Hi									0.147015
32	1100	6	PP	Hi
33	1100	6	PP	Hi
34	1100	6	PP	Hi									0.481818
35	1100	6	PP	Hi									0.692308
36	2100	6	MM	Hi									0.268667
37	2100	6	MM	Hi									0.0895161
38	2100	6	MM	Hi
39	2100	6	MM	Hi									0.0862069
40	2100	6	MM	Hi									0.365574
1	10	7	PP	C
2	10	7	PP	C
3	10	7	PP	C
4	10	7	PP	C
5	10	7	PP	C
6	20	7	MM	C
7	20	7	MM	C
8	20	7	MM	C
9	20	7	MM	C
10	20	7	MM	C
11	125	7	PP	Lo
12	125	7	PP	Lo
13	125	7	PP	Lo	109.6	103.4	125.1	91	78	51	40	8.7018	0.459783
14	125	7	PP	Lo	104.1	97.5	120.3	90.5	76.5	42	30.5	9.1511	0.125
15	125	7	PP	Lo	88.15	80.6	110.5	88.5	71	39.5	29	8.20525	0.0308333
16	225	7	MM	Lo	72.85	63.7	101.95	84	62	24.5	13.5	10.8536	0.545181
17	225	7	MM	Lo
18	225	7	MM	Lo	100	91.4	121.9	87.5	72	28.5	21	8.06335	0.150746
19	225	7	MM	Lo	50.7	38.55	78.9	79.5	57.5	8	3	8.08695	0.0134921
20	225	7	MM	Lo	75.45	68.55	103.95	87	64.5	23	13.5	7.7323	0.225
21	150	7	PP	Med	70.9	64.55	98.65	88	64	12	6.5	10.2388	0.619403
22	150	7	PP	Med
23	150	7	PP	Med
24	150	7	PP	Med	29.4	24.7	64.3	86	54	5	0	7.4249	0.06875
25	150	7	PP	Med	70.95	62.4	95.65	84	63	34	19.5	9.90775	0.0580645
26	250	7	MM	Med
27	250	7	MM	Med	59	51.65	90.7	86.5	63	11.5	6	9.12745	0.143243
28	250	7	MM	Med	69.1	61.05	94.7	85.5	63	20	11	10.4753	0.708594
29	250	7	MM	Med	77.4	71.6	96.35	89	70	23.5	14	9.7895	0.131325
30	250	7	MM	Med	70.7	62.45	97.15	85	62.5	19	10.5	16.0558	0.220492
31	1100	7	PP	Hi	58	49.6	85.7	84.5	63	15	6.5	10.9009	0.0507576
32	1100	7	PP	Hi	56.1	48.75	79.75	84.5	62.5	19.5	7	12.8871	0.0921687
33	1100	7	PP	Hi
34	1100	7	PP	Hi	88.8	80.55	111.2	86.5	70.5	41	29	10.0023	0.527941
35	1100	7	PP	Hi	46.1	41.8	68.6	90	60	8	3	8.087	0.0163934
36	2100	7	MM	Hi	73.95	68.05	95.05	90	71	25	13.5	10.0023	0.125
37	2100	7	MM	Hi	61.4	54.4	84.2	86	63	11	5	7.6614	0.0741935
38	2100	7	MM	Hi
39	2100	7	MM	Hi	81.2	74.45	103.05	89.5	70.5	28	21.5	7.6377	0.979464
40	2100	7	MM	Hi
1	10	8	PP	C
2	10	8	PP	C
3	10	8	PP	C
4	10	8	PP	C
5	10	8	PP	C
6	20	8	MM	C
7	20	8	MM	C
8	20	8	MM	C
9	20	8	MM	C
10	20	8	MM	C
11	125	8	PP	Lo	106.85	96.9	130.9	89	73	68.5	59.5	11.9177	0.30473
12	125	8	PP	Lo
13	125	8	PP	Lo	92.85	85.7	114.9	90	72.5	56.5	46.5	9.76585	0.703297
14	125	8	PP	Lo	106	94.15	131.2	87	70	70.5	60.5	12.4379	0.392424
15	125	8	PP	Lo	81.5	73.4	106.85	86.5	66.5	34	23	10.9245	0.273333
16	225	8	MM	Lo	93.55	85.15	114.65	89.5	72.5	64.5	53	10.5462	0.140625
17	225	8	MM	Lo
18	225	8	MM	Lo	60.9	51.9	88.6	82	58.5	6.5	2.5	10.2152	0.0226563
19	225	8	MM	Lo	96.15	85.8	123.55	86.5	68	58.5	47	12.5325	0.187705
20	225	8	MM	Lo	81.1	74.25	106.55	90	68	43.5	34.5	8.1579	1.03361
21	150	8	PP	Med	79.9	70.7	109.4	86	63.5	33	24.5	10.5462	0.745455
22	150	8	PP	Med
23	150	8	PP	Med	103.05	96.9	124.25	92	75.5	43.5	36	8.84365	0.0760563
24	150	8	PP	Med	73.75	61.7	106.85	80.5	57.5	30	19	10.83	0.163281
25	150	8	PP	Med	89.3	80.1	115.7	86.5	66.5	48	36.5	11.563	0.384426
26	250	8	MM	Med	98.5	90.4	119.9	89.5	73	49	38	9.31655	0.589844
27	250	8	MM	Med	89.05	80.35	114.9	87.5	67	36	30	10.7118	0.0842466
28	250	8	MM	Med	92.1	82.35	118	88	69	51.5	42	10.9718	0.996825
29	250	8	MM	Med	93.9	84	117.5	88	70.5	68	55.5	11.8704	0.537342
30	250	8	MM	Med	88.15	79.7	113.25	87.5	68	44	33	11.1609	0.205738
31	1100	8	PP	Hi	59.5	50.15	90.25	82	57	16.5	7.5	10.8536	0.0871212
32	1100	8	PP	Hi
33	1100	8	PP	Hi
34	1100	8	PP	Hi	99.85	91.3	118.65	89.5	74.5	57.5	47	11.1846	0.336154
35	1100	8	PP	Hi	104.65	95.1	127.45	89	73	68	59	10.1915	1.76721
36	2100	8	MM	Hi	94	86.6	117.55	90.5	73	46	37.5	9.8841	0.503521
37	2100	8	MM	Hi
38	2100	8	MM	Hi	92.85	83.95	118.1	89	70.5	59	51	11.5157	0.950746
39	2100	8	MM	Hi	73.05	66.25	97.2	87.5	65.5	28	18	10.4279	0.35
40	2100	8	MM	Hi	82.4	73.7	111.1	87	65.5	15.5	10.5	11.161	0.0581967
1	10	9	PP	C
2	10	9	PP	C
3	10	9	PP	C
4	10	9	PP	C
5	10	9	PP	C
6	20	9	MM	C
7	20	9	MM	C
8	20	9	MM	C
9	20	9	MM	C
10	20	9	MM	C
11	125	9	PP	Lo									0.569014
12	125	9	PP	Lo									0.550735
13	125	9	PP	Lo									1.52045
14	125	9	PP	Lo									0.940769
15	125	9	PP	Lo									1.98475
16	225	9	MM	Lo									0.943038
17	225	9	MM	Lo									1.66583
18	225	9	MM	Lo									1.17
19	225	9	MM	Lo									1.29333
20	225	9	MM	Lo									1.66557
21	150	9	PP	Med									2.09846
22	150	9	PP	Med									0.656579
23	150	9	PP	Med									2.30145
24	150	9	PP	Med									0.522222
25	150	9	PP	Med									0.257627
26	250	9	MM	Med									0.742063
27	250	9	MM	Med
28	250	9	MM	Med									0.496825
29	250	9	MM	Med									4.06173
30	250	9	MM	Med									1.53559
31	1100	9	PP	Hi									1.04231
32	1100	9	PP	Hi									0.624684
33	1100	9	PP	Hi									0.0641667
34	1100	9	PP	Hi									1.51538
35	1100	9	PP	Hi									2.3178
36	2100	9	MM	Hi									1.08429
37	2100	9	MM	Hi									0.0358333
38	2100	9	MM	Hi									0.556923
39	2100	9	MM	Hi									2.19815
40	2100	9	MM	Hi									1.1625
1	10	10	PP	C	62.7	57.7	89.5	88	57	6	2	6.148	0.019403
2	10	10	PP	C	82.05	72	107.4	85	66.5	41.5	30.5	8.82	0.0876923
3	10	10	PP	C	38.5	37.3	71.35	96	49	2.5	0.5	4.23265	0.0159722
4	10	10	PP	C
5	10	10	PP	C
6	20	10	MM	C	101.3	93.65	124.9	90	73.5	40	34.5	7.6377	0.0471014
7	20	10	MM	C	36.65	24.45	102.2	68.5	30.5	3	0.5	4.8238	0.186905
8	20	10	MM	C
9	20	10	MM	C
10	20	10	MM	C
11	125	10	PP	Lo	115.65	107.15	133.95	89.5	77	60.5	50	12.8163	0.295714
12	125	10	PP	Lo	107.5	98.7	127.05	89.5	75	66.5	52.5	9.62395	1.275
13	125	10	PP	Lo	92.95	85.4	112.25	89	72.5	45.5	32	13.2418	0.0954023
14	125	10	PP	Lo	107	95.6	131.05	87	70.5	70.5	58.5	12.4615	0.935156
15	125	10	PP	Lo	99.9	89.45	122.95	85	70	34.5	25	12.296	0.0339286
16	225	10	MM	Lo	111.55	102.9	132.35	91	76	69.5	60.5	9.00915	2.76948
17	225	10	MM	Lo
18	225	10	MM	Lo	107.85	98.6	129.1	90	74.5	56	49.5	7.54315	2.52619
19	225	10	MM	Lo	113.6	104.6	134	89	74.5	65.5	55	10.5462	0.0560345
20	225	10	MM	Lo	86.85	80.4	106.8	89.5	73.5	40.5	27.5	8.9146	0.229167
21	150	10	PP	Med	77.6	69.5	98.25	86.5	68	54	35.5	11.894	2.3625
22	150	10	PP	Med	111.05	100.45	130.85	85.5	73.5	22.5	17	7.8978	0.0776316
23	150	10	PP	Med	120.45	110.25	140.6	89	76	64.5	56.5	11.4921	1.14118
24	150	10	PP	Med	111.15	98.6	136.45	84.5	69.5	62.5	49	13.9749	0.320635
25	150	10	PP	Med	86.05	76.25	112.45	85	65.5	42	29.5	11.5866	0.182759
26	250	10	MM	Med	107.8	97.45	127.1	88	74.5	65	54	9.1747	1.275
27	250	10	MM	Med	99.2	90.05	120.45	88.5	72	42.5	34	10.5225	0.409859
28	250	10	MM	Med	84.2	76.45	106.4	88	69.5	45	31.5	14.1404	0.503968
29	250	10	MM	Med	122.85	112.65	142.4	90.5	78	73	67	8.77275	3.11125
30	250	10	MM	Med	137	125	155.7	89.5	79	83	77	10.6171	1.40948
31	1100	10	PP	Hi	76.55	67.2	107.2	83	61.5	19.5	12	9.5767	0.0892308
32	1100	10	PP	Hi	138	125.35	155.7	89	79	78	68.5	12.7453	0.0275641
33	1100	10	PP	Hi	71.25	65.15	95.35	88	65	10.5	5.5	12.698	0.0291667
34	1100	10	PP	Hi	98.55	90.55	118.4	89.5	74	53.5	43	12.296	0.366935
35	1100	10	PP	Hi	97.1	91.85	116.3	92	76	21.5	17.5	7.54315	0.296491
36	2100	10	MM	Hi	100.8	92.4	122.65	90	73	87	77	9.62395	4.44559
37	2100	10	MM	Hi	63.1	54.85	86.7	84	65	18.5	8.5	11.2083	0.0308333
38	2100	10	MM	Hi	79.95	73.65	103.2	90	68.5	25.5	17	11.0191	0.307143
39	2100	10	MM	Hi	108.65	98.95	130.1	89.5	74.5	71.5	61	9.8841	1.07549
40	2100	10	MM	Hi	71.95	65.5	95.6	88.5	66.5	29	17.5	11.7049	0.538136
